# Supplementary material for: Fungal community analysis in seawater of the Mariana Trench as estimated by Illumina HiSeq
Source: PubMed Central journal article supplement — RSC Adv. 2019 Feb 28;9(12):6956–64. doi: 10.1039/c8ra10142f (PMC9061085; doi:10.1039/c8ra10142f), 2019-02-28
Supplement: RA-009-C8RA10142F-s001.pdf [file RA-009-C8RA10142F-s001.pdf]

Supplementary materials for:

**Fungal community analysis in the seawater of the Mariana Trench as  
estimated by Illumina HiSeq**

Zhi-Peng Wang <sup>b, †</sup>, Zeng-Zhi Liu <sup>c, †</sup>, Yi-Lin Wang <sup>d</sup>, Wang-Hua Bi <sup>e</sup>, Lu Liu <sup>e</sup>, Hai-Ying Wang <sup>b</sup>,  
Yuan Zheng <sup>b</sup>, Lin-Lin Zhang <sup>e</sup>, Shu-Gang Hu <sup>e</sup>, Shan-Shan Xu <sup>c, \*</sup>, Peng Zhang <sup>a, \*</sup>

1 Tobacco Research Institute, Chinese Academy of Agricultural Sciences, Qingdao, 266101,  
China

2 Key Laboratory of Sustainable Development of Polar Fishery, Ministry of Agriculture and Rural  
Affairs, Yellow Sea Fisheries Research Institute, Chinese Academy of Fishery Sciences, Qingdao,  
266071, China

3 School of Medicine and Pharmacy, Ocean University of China, Qingdao, 266003, China.

4 College of Science, China University of Petroleum, Qingdao, Shandong 266580, China.

5 College of Chemistry & Environmental Engineering, Shandong University of Science &  
Technology, Qingdao, 266510, China.

a These authors contributed equally to this work

\*Authors to whom correspondence should be addressed

**Supplementary Table S1. Read counts of OTUs in different sampled sites.**

| <b>OTUs</b>  | <b>M1.1</b> | <b>M1.2</b> | <b>M1.3</b> | <b>M1.4</b> | <b>M3.1</b> | <b>M3.2</b> | <b>M3.4</b> | <b>M4.2</b> | <b>M4.3</b> | <b>M4.4</b> | <b>M7.1</b> | <b>M7.2</b> | <b>M7.3</b> | <b>Total number</b> |
|--------------|-------------|-------------|-------------|-------------|-------------|-------------|-------------|-------------|-------------|-------------|-------------|-------------|-------------|---------------------|
| <b>OTU1</b>  | 13714       | 398         | 5405        | 671         | 11604       | 3286        | 3452        | 349         | 3560        | 2537        | 383         | 2629        | 3203        | 51204               |
| <b>OTU2</b>  | 6477        | 2203        | 2188        | 1048        | 2225        | 1722        | 235         | 1270        | 2564        | 5258        | 7149        | 7131        | 3606        | 43089               |
| <b>OTU3</b>  | 165         | 39          | 13084       | 37          | 81          | 7           | 11          | 11          | 2           | 176         | 289         | 4           | 2102        | 16021               |
| <b>OTU4</b>  | 642         | 4347        | 439         | 514         | 638         | 191         | 170         | 179         | 0           | 1969        | 570         | 678         | 0           | 10348               |
| <b>OTU5</b>  | 28          | 13          | 4806        | 7           | 44          | 151         | 10          | 620         | 3           | 193         | 38          | 9           | 55          | 5990                |
| <b>OTU6</b>  | 75          | 1745        | 42          | 322         | 196         | 19          | 22          | 24          | 12          | 543         | 48          | 132         | 1           | 3194                |
| <b>OTU7</b>  | 38          | 34          | 991         | 12          | 660         | 12          | 170         | 11          | 1051        | 42          | 49          | 23          | 42          | 3148                |
| <b>OTU8</b>  | 2           | 52          | 1           | 3           | 12          | 2           | 0           | 0           | 10          | 1           | 5           | 2848        | 10          | 2957                |
| <b>OTU9</b>  | 35          | 67          | 12          | 15          | 22          | 10          | 6           | 5           | 27          | 894         | 264         | 974         | 23          | 2367                |
| <b>OTU10</b> | 404         | 124         | 982         | 116         | 1488        | 217         | 28          | 91          | 259         | 487         | 378         | 41          | 25          | 4653                |
| <b>OTU11</b> | 95          | 27          | 11          | 67          | 148         | 42          | 5           | 260         | 1384        | 328         | 79          | 921         | 30          | 3410                |
| <b>OTU12</b> | 84          | 8           | 834         | 3           | 45          | 3           | 4           | 317         | 47          | 101         | 31          | 2           | 24          | 1516                |
| <b>OTU13</b> | 587         | 5           | 7           | 7           | 9           | 5           | 3           | 2           | 0           | 9           | 7           | 0           | 0           | 651                 |
| <b>OTU14</b> | 42          | 9           | 4           | 22          | 179         | 4           | 7           | 5           | 5           | 331         | 187         | 0           | 0           | 806                 |
| <b>OTU15</b> | 46          | 9           | 5           | 5           | 154         | 4           | 4           | 4           | 4           | 192         | 142         | 0           | 0           | 580                 |
| <b>OTU16</b> | 82          | 5           | 45          | 5           | 33          | 5           | 0           | 2           | 1           | 322         | 14          | 0           | 1           | 526                 |
| <b>OTU17</b> | 32          | 4           | 5           | 5           | 96          | 3           | 4           | 3           | 1           | 210         | 86          | 0           | 0           | 460                 |
| <b>OTU18</b> | 28          | 1           | 4           | 2           | 2           | 1           | 2           | 0           | 1           | 0           | 2           | 1           | 238         | 293                 |
| <b>OTU19</b> | 7           | 32          | 56          | 57          | 6           | 2           | 2           | 3           | 0           | 247         | 8           | 9           | 0           | 440                 |
| <b>OTU20</b> | 3           | 2           | 2           | 2           | 1           | 0           | 0           | 244         | 0           | 1           | 9           | 0           | 0           | 272                 |
| <b>OTU21</b> | 1           | 1           | 1           | 0           | 2           | 0           | 4           | 231         | 0           | 0           | 1           | 0           | 0           | 249                 |
| <b>OTU22</b> | 17          | 9           | 5           | 1           | 60          | 15          | 0           | 1           | 1           | 111         | 76          | 2           | 2           | 312                 |
| <b>OTU23</b> | 0           | 4           | 0           | 0           | 0           | 0           | 0           | 0           | 2           | 0           | 0           | 209         | 1           | 220                 |
| <b>OTU24</b> | 1           | 5           | 6           | 1           | 8           | 1           | 3           | 0           | 1           | 179         | 18          | 1           | 0           | 235                 |
| <b>OTU25</b> | 3           | 1           | 1           | 1           | 2           | 194         | 1           | 1           | 0           | 0           | 5           | 0           | 0           | 218                 |
| <b>OTU26</b> | 10          | 2           | 137         | 0           | 4           | 2           | 1           | 0           | 1           | 35          | 29          | 1           | 5           | 238                 |
| <b>OTU27</b> | 36          | 20          | 95          | 4           | 18          | 3           | 2           | 7           | 0           | 9           | 18          | 0           | 41          | 261                 |
| <b>OTU28</b> | 3           | 3           | 2           | 1           | 2           | 1           | 2           | 0           | 0           | 157         | 5           | 0           | 0           | 186                 |
| <b>OTU29</b> | 0           | 0           | 0           | 0           | 49          | 0           | 0           | 0           | 79          | 0           | 0           | 27          | 33          | 192                 |
| <b>OTU30</b> | 164         | 5           | 0           | 1           | 0           | 1           | 0           | 0           | 0           | 2           | 6           | 0           | 0           | 185                 |
| <b>OTU31</b> | 17          | 16          | 68          | 11          | 21          | 7           | 9           | 3           | 0           | 8           | 7           | 0           | 22          | 200                 |
| <b>OTU32</b> | 44          | 6           | 33          | 6           | 18          | 2           | 8           | 4           | 1           | 4           | 16          | 0           | 4           | 158                 |
| <b>OTU33</b> | 50          | 34          | 654         | 5           | 67          | 64          | 5           | 2           | 9           | 511         | 99          | 812         | 20          | 2345                |
| <b>OTU34</b> | 25          | 182         | 113         | 21          | 102         | 5           | 5           | 11          | 71          | 350         | 43          | 35          | 2           | 978                 |
| <b>OTU35</b> | 3           | 4           | 5           | 1           | 126         | 2           | 0           | 1           | 8           | 2           | 3           | 0           | 0           | 165                 |
| <b>OTU36</b> | 5           | 3           | 58          | 0           | 16          | 0           | 3           | 2           | 1           | 7           | 9           | 0           | 14          | 128                 |
| <b>OTU37</b> | 19          | 3           | 1           | 0           | 26          | 3           | 0           | 0           | 0           | 10          | 33          | 2           | 1           | 107                 |
| <b>OTU38</b> | 16          | 15          | 11          | 30          | 29          | 1           | 4           | 4           | 0           | 38          | 44          | 1           | 0           | 204                 |
| <b>OTU39</b> | 74          | 1           | 1           | 1           | 3           | 0           | 0           | 0           | 0           | 3           | 1           | 0           | 0           | 91                  |
| <b>OTU40</b> | 0           | 0           | 0           | 0           | 0           | 0           | 0           | 0           | 14          | 0           | 0           | 40          | 12          | 69                  |

|       |      |     |      |     |      |      |      |      |      |      |      |      |      |       |
|-------|------|-----|------|-----|------|------|------|------|------|------|------|------|------|-------|
| OTU41 | 9    | 3   | 0    | 0   | 2    | 2    | 0    | 0    | 0    | 0    | 66   | 0    | 0    | 87    |
| OTU42 | 50   | 8   | 2    | 2   | 20   | 15   | 1    | 0    | 0    | 27   | 23   | 1    | 0    | 159   |
| OTU43 | 58   | 3   | 0    | 0   | 1    | 0    | 2    | 1    | 0    | 48   | 1    | 1    | 0    | 123   |
| OTU44 | 48   | 0   | 0    | 0   | 50   | 1    | 0    | 1    | 1    | 0    | 1    | 0    | 0    | 108   |
| OTU45 | 3    | 1   | 61   | 0   | 0    | 0    | 1    | 0    | 0    | 3    | 1    | 0    | 0    | 76    |
| OTU46 | 1    | 1   | 0    | 14  | 3    | 0    | 1    | 0    | 0    | 23   | 5    | 0    | 0    | 55    |
| OTU47 | 4    | 1   | 1    | 0   | 3    | 1    | 0    | 0    | 0    | 2    | 32   | 0    | 1    | 53    |
| OTU48 | 1    | 0   | 0    | 2   | 0    | 0    | 0    | 0    | 0    | 31   | 4    | 0    | 0    | 42    |
| OTU49 | 1    | 0   | 0    | 0   | 0    | 0    | 0    | 0    | 0    | 38   | 0    | 0    | 0    | 41    |
| OTU50 | 3    | 4   | 0    | 2   | 1    | 1    | 2    | 5    | 0    | 8    | 6    | 0    | 0    | 41    |
| OTU51 | 13   | 2   | 0    | 0   | 8    | 0    | 0    | 0    | 3    | 0    | 0    | 2    | 0    | 33    |
| OTU52 | 13   | 7   | 8    | 2   | 44   | 61   | 5    | 70   | 4    | 67   | 116  | 0    | 0    | 408   |
| OTU53 | 2    | 2   | 6    | 3   | 11   | 1    | 0    | 2    | 0    | 12   | 33   | 0    | 0    | 81    |
| OTU54 | 6    | 1   | 1    | 0   | 15   | 0    | 0    | 1    | 1    | 23   | 1    | 3    | 0    | 61    |
| OTU55 | 9    | 0   | 0    | 0   | 0    | 0    | 0    | 0    | 2    | 0    | 0    | 2    | 6    | 23    |
| OTU56 | 0    | 0   | 0    | 0   | 0    | 1    | 1    | 0    | 0    | 0    | 13   | 0    | 0    | 18    |
| OTU57 | 277  | 539 | 2297 | 120 | 8768 | 303  | 2022 | 4085 | 4589 | 3558 | 550  | 115  | 56   | 27292 |
| OTU58 | 1    | 0   | 0    | 19  | 0    | 0    | 0    | 1    | 0    | 0    | 0    | 1    | 0    | 26    |
| OTU59 | 2    | 0   | 1    | 0   | 5    | 0    | 0    | 2    | 1    | 0    | 1    | 0    | 0    | 18    |
| OTU60 | 1    | 1   | 0    | 0   | 0    | 0    | 0    | 0    | 0    | 1    | 14   | 0    | 0    | 21    |
| OTU61 | 0    | 0   | 0    | 0   | 2    | 0    | 0    | 0    | 0    | 4    | 16   | 0    | 0    | 25    |
| OTU62 | 0    | 0   | 1    | 0   | 12   | 0    | 0    | 0    | 0    | 0    | 1    | 0    | 0    | 17    |
| OTU63 | 1    | 0   | 0    | 0   | 0    | 0    | 0    | 0    | 1    | 0    | 15   | 0    | 1    | 22    |
| OTU64 | 0    | 1   | 1    | 0   | 1    | 0    | 0    | 0    | 0    | 1    | 10   | 0    | 0    | 19    |
| OTU65 | 0    | 1   | 0    | 0   | 7    | 0    | 0    | 0    | 0    | 0    | 0    | 0    | 0    | 10    |
| OTU66 | 0    | 1   | 0    | 12  | 4    | 0    | 0    | 0    | 0    | 0    | 0    | 0    | 0    | 20    |
| OTU67 | 0    | 2   | 1    | 0   | 0    | 1    | 0    | 0    | 0    | 0    | 13   | 0    | 0    | 21    |
| OTU68 | 1913 | 224 | 256  | 192 | 1701 | 1154 | 47   | 57   | 135  | 3246 | 4277 | 1472 | 4275 | 18962 |
| OTU69 | 0    | 0   | 4    | 0   | 4    | 0    | 0    | 0    | 0    | 0    | 5    | 0    | 0    | 16    |
| OTU70 | 0    | 1   | 0    | 1   | 1    | 1    | 0    | 0    | 0    | 0    | 2    | 0    | 0    | 11    |
| OTU71 | 0    | 1   | 0    | 1   | 0    | 0    | 0    | 0    | 0    | 0    | 5    | 0    | 0    | 10    |
| OTU72 | 0    | 0   | 0    | 0   | 1    | 0    | 0    | 0    | 0    | 0    | 4    | 0    | 0    | 7     |
| OTU73 | 1    | 0   | 0    | 0   | 3    | 0    | 1    | 2    | 1    | 2    | 1    | 0    | 0    | 18    |
| OTU74 | 0    | 0   | 0    | 0   | 3    | 0    | 0    | 0    | 0    | 0    | 0    | 0    | 0    | 5     |
| OTU75 | 0    | 3   | 0    | 0   | 0    | 0    | 0    | 0    | 0    | 0    | 0    | 0    | 0    | 4     |
| OTU76 | 0    | 0   | 1    | 0   | 1    | 0    | 0    | 0    | 0    | 2    | 1    | 0    | 0    | 9     |
| OTU77 | 0    | 1   | 0    | 0   | 0    | 1    | 0    | 0    | 0    | 1    | 0    | 0    | 0    | 6     |
| OTU78 | 1    | 0   | 0    | 1   | 0    | 0    | 0    | 0    | 0    | 1    | 3    | 0    | 0    | 9     |
| OTU79 | 0    | 0   | 0    | 0   | 1    | 0    | 0    | 0    | 2    | 1    | 1    | 0    | 0    | 9     |
| OTU80 | 0    | 0   | 0    | 0   | 0    | 0    | 0    | 0    | 0    | 0    | 1    | 0    | 0    | 2     |
| OTU81 | 0    | 0   | 0    | 0   | 0    | 0    | 0    | 0    | 0    | 1    | 1    | 0    | 0    | 4     |
| OTU82 | 0    | 0   | 0    | 0   | 1    | 0    | 0    | 0    | 2    | 0    | 0    | 0    | 1    | 7     |
| OTU83 | 0    | 1   | 0    | 0   | 0    | 0    | 0    | 0    | 0    | 0    | 1    | 0    | 0    | 4     |

|                     |       |       |       |      |       |      |      |      |       |       |       |       |       |        |
|---------------------|-------|-------|-------|------|-------|------|------|------|-------|-------|-------|-------|-------|--------|
| <b>OTU84</b>        | 18    | 31    | 9     | 11   | 16    | 4    | 5    | 2    | 0     | 20    | 20    | 1     | 0     | 148    |
| <b>OTU85</b>        | 15    | 0     | 1     | 0    | 17    | 0    | 0    | 1    | 9     | 304   | 15    | 17    | 3     | 391    |
| <b>OTU86</b>        | 0     | 0     | 0     | 0    | 1     | 0    | 0    | 0    | 0     | 0     | 0     | 0     | 0     | 2      |
| <b>OTU87</b>        | 0     | 0     | 0     | 0    | 3     | 0    | 0    | 0    | 1     | 0     | 0     | 0     | 0     | 6      |
| <b>OTU88</b>        | 20    | 11    | 469   | 50   | 44    | 3    | 4    | 1    | 3     | 379   | 72    | 1     | 4     | 1074   |
| <b>OTU89</b>        | 1     | 0     | 0     | 0    | 0     | 0    | 0    | 0    | 0     | 0     | 1     | 0     | 0     | 4      |
| <b>OTU90</b>        | 0     | 0     | 0     | 1    | 0     | 0    | 0    | 0    | 0     | 0     | 0     | 0     | 0     | 2      |
| <b>OTU91</b>        | 140   | 38    | 117   | 32   | 183   | 151  | 8    | 13   | 574   | 181   | 130   | 16    | 8     | 1604   |
| <b>Total number</b> | 25686 | 10327 | 33351 | 3469 | 29133 | 7688 | 6282 | 7911 | 14448 | 23251 | 15613 | 18164 | 13872 | 209880 |

**Supplementary Table S2. Information of OTUs annotation.**

| OTUs  | Kindom | Phylum        | Class               | Order             | Family             | Genus                  | Length (bp) | Similarity (%) |
|-------|--------|---------------|---------------------|-------------------|--------------------|------------------------|-------------|----------------|
| OTU1  | Fungi  | Ascomycota    | Sordariomycetes     | Hypocreales       | Cordycipitaceae    | Unidentified           | 306         | 91             |
| OTU2  | Fungi  | Basidiomycota | Malasseziomycete    | Malasseziales     | Malasseziaceae     | <i>Malassezia</i>      | 297         | 100            |
| OTU3  | Fungi  | Ascomycota    | Dothideomycetes     | Pleosporales      | Pleosporaceae      | <i>Cochliobolus</i>    | 305         | 64             |
| OTU4  | Fungi  | Ascomycota    | Saccharomycetes     | Saccharomycetales | Saccharomycetaceae | <i>Yamadazyma</i>      | 300         | 69             |
| OTU5  | Fungi  | Ascomycota    | Unidentified        | Unidentified      | Unidentified       | Unidentified           | 306         | 100            |
| OTU6  | Fungi  | Ascomycota    | Sordariomycetes     | Hypocreales       | incertae           | <i>Emericellopsis</i>  | 306         | 88             |
| OTU7  | Fungi  | Ascomycota    | Eurotiomycetes      | Chaetothyriales   | Unidentified       | Unidentified           | 305         | 82             |
| OTU8  | Fungi  | Basidiomycota | Exobasidiomycetes   | Entylomatales     | incertae           | <i>Tilletiopsis</i>    | 306         | 100            |
| OTU9  | Fungi  | Ascomycota    | Saccharomycetes     | Saccharomycetales | Wickerhamomyceteae | <i>Wickerhamomyces</i> | 298         | 100            |
| OTU10 | Fungi  | Ascomycota    | Eurotiomycetes      | Eurotiales        | Trichocomaceae     | <i>Aspergillus</i>     | 305         | 99             |
| OTU11 | Fungi  | Ascomycota    | Dothideomycetes     | Capnodiales       | Davidiellaceae     | <i>Cladosporium</i>    | 306         | 97             |
| OTU12 | Fungi  | Ascomycota    | Eurotiomycetes      | Eurotiales        | Trichocomaceae     | <i>Talaromyces</i>     | 306         | 100            |
| OTU13 | Fungi  | Basidiomycota | Microbotryomycetes  | Sporidiobolales   | Sporidiobolaceae   | <i>Sporidiobolus</i>   | 308         | 97             |
| OTU14 | Fungi  | Basidiomycota | Microbotryomycetes  | Sporidiobolales   | Sporidiobolaceae   | <i>Rhodotorula</i>     | 308         | 69             |
| OTU15 | Fungi  | Ascomycota    | Saccharomycetes     | Saccharomycetales | Debaryomycetaceae  | <i>Candida</i>         | 293         | 100            |
| OTU16 | Fungi  | Ascomycota    | Unidentified        | Unidentified      | Unidentified       | Unidentified           | 305         | 100            |
| OTU17 | Fungi  | Basidiomycota | Cystobasidiomycetes | Cystobasidiales   | Cystobasidiaceae   | <i>Cystobasidium</i>   | 309         | 100            |
| OTU18 | Fungi  | Basidiomycota | Ustilaginomycetes   | Ustilaginales     | Unidentified       | Unidentified           | 300         | 99             |
| OTU19 | Fungi  | Ascomycota    | Unidentified        | Unidentified      | Unidentified       | Unidentified           | 308         | 98             |
| OTU20 | Fungi  | Basidiomycota | Agaricomycetes      | Unidentified      | Unidentified       | Unidentified           | 307         | 96             |
| OTU21 | Fungi  | Basidiomycota | Agaricomycetes      | Unidentified      | Unidentified       | Unidentified           | 306         | 98             |

|              |       |               |                      |                   |                    |                        |     |     |
|--------------|-------|---------------|----------------------|-------------------|--------------------|------------------------|-----|-----|
| <b>OTU22</b> | Fungi | Basidiomycota | Malasseziomycetes    | Malasseziales     | Malasseziaceae     | <i>Malassezia</i>      | 301 | 100 |
| <b>OTU23</b> | Fungi | Ascomycota    | Leotiomycetes        | Thelebolales      | Unidentified       | Unidentified           | 306 | 99  |
| <b>OTU24</b> | Fungi | Ascomycota    | Dothideomycetes      | Venturiales       | Symptoventuriaceae | <i>Ochroconis</i>      | 306 | 86  |
| <b>OTU25</b> | Fungi | Basidiomycota | Agaricomycetes       | Agaricales        | Schizophyllaceae   | <i>Schizophyllum</i>   | 306 | 88  |
| <b>OTU26</b> | Fungi | Basidiomycota | Tremellomycetes      | Tremellales       | Tremellaceae       | <i>Cryptococcus</i>    | 306 | 94  |
| <b>OTU27</b> | Fungi | Basidiomycota | Tremellomycetes      | Tremellales       | Tremellaceae       | <i>Cryptococcus</i>    | 306 | 69  |
| <b>OTU28</b> | Fungi | Basidiomycota | Cystobasidiomycetes  | Erythrobasidiales | Erythrobasidiaceae | <i>Erythrobasidium</i> | 309 | 96  |
| <b>OTU29</b> | Fungi | Unidentified  | Unidentified         | Unidentified      | Unidentified       | Unidentified           | 306 | 100 |
| <b>OTU30</b> | Fungi | Basidiomycota | Agaricostilbomycetes | Agaricostilbales  | Kondoaceae         | <i>Kondoa</i>          | 314 | 65  |
| <b>OTU31</b> | Fungi | Glomeromycota | Glomeromycetes       | Glomerales        | Unidentified       | Unidentified           | 307 | 97  |
| <b>OTU32</b> | Fungi | Basidiomycota | Wallemiomycetes      | Wallemiales       | Wallemiaceae       | <i>Wallemia</i>        | 302 | 100 |
| <b>OTU33</b> | Fungi | Ascomycota    | Dothideomycetes      | Capnodiales       | Teratosphaeriaceae | <i>Hortaea</i>         | 307 | 83  |
| <b>OTU34</b> | Fungi | Ascomycota    | Sordariomycetes      | Hypocreales       | incertae           | <i>Sarocladium</i>     | 306 | 96  |
| <b>OTU35</b> | Fungi | Ascomycota    | Saccharomycetes      | Saccharomycetales | Unidentified       | Unidentified           | 303 | 100 |
| <b>OTU36</b> | Fungi | Ascomycota    | Eurotiomycetes       | Chaetothyriales   | Chaetothyriaceae   | <i>Cyphellophora</i>   | 305 | 93  |
| <b>OTU37</b> | Fungi | Ascomycota    | Saccharomycetes      | Saccharomycetales | Dipodascaceae      | <i>Yarrowia</i>        | 241 | 100 |
| <b>OTU38</b> | Fungi | Ascomycota    | Saccharomycetes      | Saccharomycetales | Debaryomycetaceae  | <i>Candida</i>         | 292 | 100 |
| <b>OTU39</b> | Fungi | Ascomycota    | Dothideomycetes      | Pleosporales      | Lophiostomataceae  | <i>Lophiostoma</i>     | 306 | 85  |
| <b>OTU40</b> | Fungi | Ascomycota    | Saccharomycetes      | Saccharomycetales | Saccharomycetaceae | <i>Pichia</i>          | 286 | 100 |
| <b>OTU41</b> | Fungi | Basidiomycota | Microbotryomycetes   | Sporidiobolales   | Unidentified       | Unidentified           | 308 | 100 |
| <b>OTU42</b> | Fungi | Ascomycota    | Saccharomycetes      | Saccharomycetales | Debaryomycetaceae  | <i>Candida</i>         | 304 | 68  |
| <b>OTU43</b> | Fungi | Basidiomycota | Microbotryomycetes   | Sporidiobolales   | Sporidiobolaceae   | <i>Rhodotorula</i>     | 308 | 94  |
| <b>OTU44</b> | Fungi | Basidiomycota | Agaricomycetes       | Polyporales       | Meruliaceae        | <i>Ceriporia</i>       | 306 | 100 |
| <b>OTU45</b> | Fungi | Cryptomycota  | Unidentified         | Unidentified      | Unidentified       | Unidentified           | 292 | 100 |
| <b>OTU46</b> | Fungi | Ascomycota    | Sordariomycetes      | Sordariales       | Sordariaceae       | <i>Neurospora</i>      | 306 | 96  |

|              |       |                 |                      |                   |                    |                       |     |     |
|--------------|-------|-----------------|----------------------|-------------------|--------------------|-----------------------|-----|-----|
| <b>OTU47</b> | Fungi | Basidiomycota   | Malasseziomycetes    | Malasseziales     | Malasseziaceae     | <i>Malassezia</i>     | 297 | 99  |
| <b>OTU48</b> | Fungi | Basidiomycota   | Microbotryomycetes   | Sporidiobolales   | Sporidiobolaceae   | <i>Sporobolomyces</i> | 310 | 67  |
| <b>OTU49</b> | Fungi | Basidiomycota   | Moniliellomycetes    | Moniliellales     | Moniliellaceae     | <i>Moniliella</i>     | 313 | 100 |
| <b>OTU50</b> | Fungi | Ascomycota      | Saccharomycetes      | Saccharomycetales | Debaryomycetaceae  | <i>Candida</i>        | 305 | 87  |
| <b>OTU51</b> | Fungi | Unidentified    | Unidentified         | Unidentified      | Unidentified       | Unidentified          | 302 | 83  |
| <b>OTU52</b> | Fungi | Ascomycota      | Eurotiomycetes       | Eurotiales        | Unidentified       | Unidentified          | 304 | 100 |
| <b>OTU53</b> | Fungi | Ascomycota      | Dothideomycetes      | Pleosporales      | Unidentified       | Unidentified          | 304 | 96  |
| <b>OTU54</b> | Fungi | Basidiomycota   | Microbotryomycetes   | Sporidiobolaceae  | Sakaguchiaceae     | <i>Sakaguchia</i>     | 309 | 100 |
| <b>OTU55</b> | Fungi | Basidiomycota   | Exobasidiomycetes    | Exobasidiales     | Unidentified       | Unidentified          | 315 | 100 |
| <b>OTU56</b> | Fungi | Ascomycota      | Sordariomycetes      | Sordariales       | Unidentified       | Unidentified          | 306 | 79  |
| <b>OTU57</b> | Fungi | Ascomycota      | Unidentified         | Unidentified      | Unidentified       | Unidentified          | 306 | 100 |
| <b>OTU58</b> | Fungi | Basidiomycota   | Exobasidiomycetes    | Exobasidiales     | Exobasidiaceae     | <i>Exobasidium</i>    | 315 | 99  |
| <b>OTU59</b> | Fungi | Chytridiomycota | Chytridiomycetes     | Unidentified      | Unidentified       | Unidentified          | 307 | 88  |
| <b>OTU60</b> | Fungi | Ascomycota      | Sordariomycetes      | Hypocreomycetidae | Glomerellales      | <i>Sodiomyces</i>     | 308 | 83  |
| <b>OTU61</b> | Fungi | Basidiomycota   | Agaricostilbomycetes | Agaricostilbales  | Agaricostilbaceae  | <i>Agaricostilbum</i> | 311 | 95  |
| <b>OTU62</b> | Fungi | Ascomycota      | Pezizomycetes        | Pezizales         | Unidentified       | Unidentified          | 306 | 97  |
| <b>OTU63</b> | Fungi | Basidiomycota   | Exobasidiomycetes    | Entylomatales     | incertae           | <i>Tilletiopsis</i>   | 306 | 93  |
| <b>OTU64</b> | Fungi | Ascomycota      | Saccharomycetes      | Saccharomycetales | Saccharomycetaceae | <i>Saccharomyces</i>  | 305 | 100 |
| <b>OTU65</b> | Fungi | Basidiomycota   | Tremellomycetes      | Tremellales       | Unidentified       | Unidentified          | 306 | 100 |
| <b>OTU66</b> | Fungi | Ascomycota      | Saccharomycetes      | Saccharomycetales | Debaryomycetaceae  | <i>Candida</i>        | 304 | 100 |
| <b>OTU67</b> | Fungi | Basidiomycota   | Microbotryomycetes   | Sporidiobolales   | Sporidiobolaceae   | <i>Sporidiobolus</i>  | 308 | 84  |
| <b>OTU68</b> | Fungi | Basidiomycota   | Malasseziomycetes    | Malasseziales     | Malasseziaceae     | <i>Malassezia</i>     | 297 | 79  |
| <b>OTU69</b> | Fungi | Basidiomycota   | Tremellomycetes      | Tremellales       | Tremellaceae       | <i>Cryptococcus</i>   | 306 | 85  |
| <b>OTU70</b> | Fungi | Basidiomycota   | Wallemiomycetes      | Wallemiales       | Wallemiaceae       | <i>Wallemia</i>       | 303 | 70  |

|              |       |                 |                   |                   |                            |                            |     |      |
|--------------|-------|-----------------|-------------------|-------------------|----------------------------|----------------------------|-----|------|
| <b>OTU71</b> | Fungi | Ascomycota      | Dothideomycetes   | Pleosporales      | Trematosphaeriaceae        | <i>Trematosphaeria</i>     | 305 | 100  |
| <b>OTU72</b> | Fungi | Basidiomycota   | Malasseziomycetes | Malasseziales     | Malasseziaceae             | <i>Malassezia</i>          | 297 | 77   |
| <b>OTU73</b> | Fungi | Ascomycota      | Sordariomycetes   | Hypocreales       | incertae                   | <i>Acremonium</i>          | 306 | 88   |
| <b>OTU74</b> | Fungi | Ascomycota      | Sordariomycetes   | Hypocreales       | Unidentified               | Unidentified               | 302 | 87   |
| <b>OTU75</b> | Fungi | Ascomycota      | Saccharomycetes   | Saccharomycetales | Saccharomycopsidaceae      | <i>Saccharomycopsis</i>    | 311 | 100  |
| <b>OTU76</b> | Fungi | Basidiomycota   | Agaricomycetes    | Agaricales        | Omphalotaceae              | <i>Gymnopus</i>            | 306 | 89   |
| <b>OTU77</b> | Fungi | incertae        | Mucoromycetes     | Mucorales         | Mucorineae                 | <i>Mucor</i>               | 314 | 100  |
| <b>OTU78</b> | Fungi | Basidiomycota   | Tremellomycetes   | Tremellales       | Trichosporonaceae          | <i>Trichosporon</i>        | 306 | 100  |
| <b>OTU79</b> | Fungi | Chytridiomycota | Chytridiomycetes  | Unidentified      | Unidentified               | Unidentified               | 306 | 1000 |
| <b>OTU80</b> | Fungi | Ascomycota      | Saccharomycetes   | Saccharomycetales | Debaryomycetaceae          | <i>Candida</i>             | 274 | 99   |
| <b>OTU81</b> | Fungi | Chytridiomycota | Chytridiomycetes  | Unidentified      | Unidentified               | Unidentified               | 307 | 88   |
| <b>OTU82</b> | Fungi | Ascomycota      | Pezizomycetes     | Pezizales         | Pezizaceae                 | <i>Peziza</i>              | 306 | 79   |
| <b>OTU83</b> | Fungi | Ascomycota      | Saccharomycetes   | Saccharomycetales | Unidentified               | Unidentified               | 302 | 100  |
| <b>OTU84</b> | Fungi | Ascomycota      | Saccharomycetes   | Saccharomycetales | Unidentified               | Unidentified               | 300 | 69   |
| <b>OTU85</b> | Fungi | Unidentified    | Unidentified      | Unidentified      | Unidentified               | Unidentified               | 293 | 71   |
| <b>OTU86</b> | Fungi | Basidiomycota   | Malasseziomycetes | Malasseziales     | Malasseziaceae             | <i>Malassezia</i>          | 301 | 92   |
| <b>OTU87</b> | Fungi | Ascomycota      | Saccharomycetes   | Saccharomycetales | Saccharomycetaceae         | <i>Kodamaea</i>            | 277 | 100  |
| <b>OTU88</b> | Fungi | Ascomycota      | Sordariomycetes   | Hypocreales       | Unidentified               | Unidentified               | 306 | 83   |
| <b>OTU89</b> | Fungi | Basidiomycota   | Tremellomycetes   | Filobasidiales    | Filobasidiaceae            | Unidentified               | 306 | 81   |
| <b>OTU90</b> | Fungi | Basidiomycota   | Exobasidiomycetes | Exobasidiales     | unclassified Exobasidiales | Unidentified Exobasidiales | 315 | 100  |
| <b>OTU91</b> | Fungi | Ascomycota      | Eurotiomycetes    | Eurotiales        | Trichocomaceae             | <i>Aspergillus</i>         | 305 | 88   |
